# Supplementary material for: LIF regulates CXCL9 in tumor-associated macrophages and prevents CD8+ T cell tumor-infiltration impairing anti-PD1 therapy
Source: PubMed Central journal article supplement (PMC6559950; doi:10.1038/s41467-019-10369-9), 2019-06-11
Supplement: 41467_2019_10369_MOESM1_ESM.pdf [file 41467_2019_10369_MOESM1_ESM.pdf]

## SUPPLEMENTARY MATERIAL

---

|                                                                                                                 |          |
|-----------------------------------------------------------------------------------------------------------------|----------|
| <b>SUPPLEMENTARY FIGURES</b>                                                                                    | <b>1</b> |
| Supplementary Figure 1. LIF expression in tumors.                                                               | 1        |
| Supplementary Figure 2. LIF blockade in syngeneic models inhibits tumor growth.                                 | 2        |
| Supplementary Figure 3. Characterization of the immune cell infiltrates upon treatment with anti-LIF.           | 5        |
| Supplementary Figure 4. Regulation of CXCL9, CCL2, CD163 and CD206 expression by LIF in GL261N tumors.          | 7        |
| Supplementary Figure 5. Cell specific expression of cytokines and receptors, and functional contributions.      | 9        |
| Supplementary Figure 6. Correlation between LIF and CD163, CD206 and CCL2 expression in GBM and ovarian cancer. | 10       |
| Supplementary Figure 7. Regulation of CXCL9 by LIF in murine and human macrophages.                             | 11       |
| Supplementary Figure 8. Regulation of CXCL9, CCL2, CD163 and CD206 expression by LIF in human GBM tumors.       | 12       |
| Supplementary Figure 9. LIF regulates infiltration of CD8+ T cells into human GBM organotypic slice cultures.   | 13       |
| Supplementary Figure 10. LIF regulates infiltration of CD8+ T cells into human GBM specimens in vivo.           | 16       |
| Supplementary Figure 11. LIF is associated to anti-PD1 treatment resistance in clinical trials.                 | 17       |

## SUPPLEMENTARY FIGURES

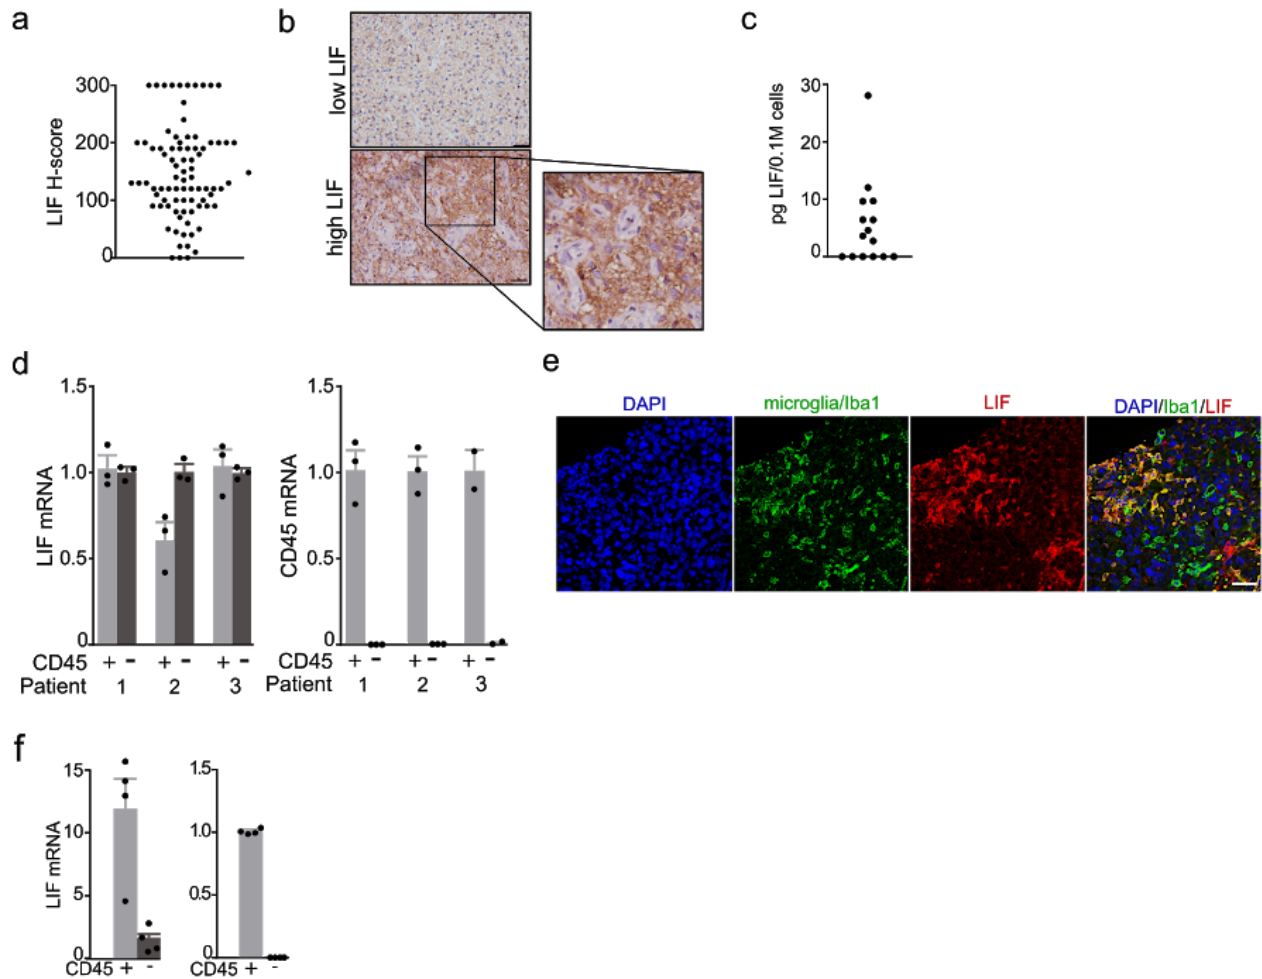

### Supplementary Figure 1. LIF expression in tumors.

**a, b**, LIF IHC was performed in tissue microarrays from human GBM and the degree of staining was quantified using the H-score method (**a**). Representative images are shown. Scale bar, 50  $\mu\text{m}$  (**b**). **c**, LIF ELISA of the supernatant from 15 patient tumoroid cultures. **d, f**, qRT-PCR analyses of the indicated genes in CD45<sup>+</sup> and CD45<sup>-</sup> cells isolated from human GBMs (**d**) and GL261N tumors (**f**). **e**, Representative images of IF of Iba1 and LIF counterstained with DAPI in GL261N tumors. Scale bar, 20  $\mu\text{m}$ . Data are presented as mean  $\pm$  SEM.

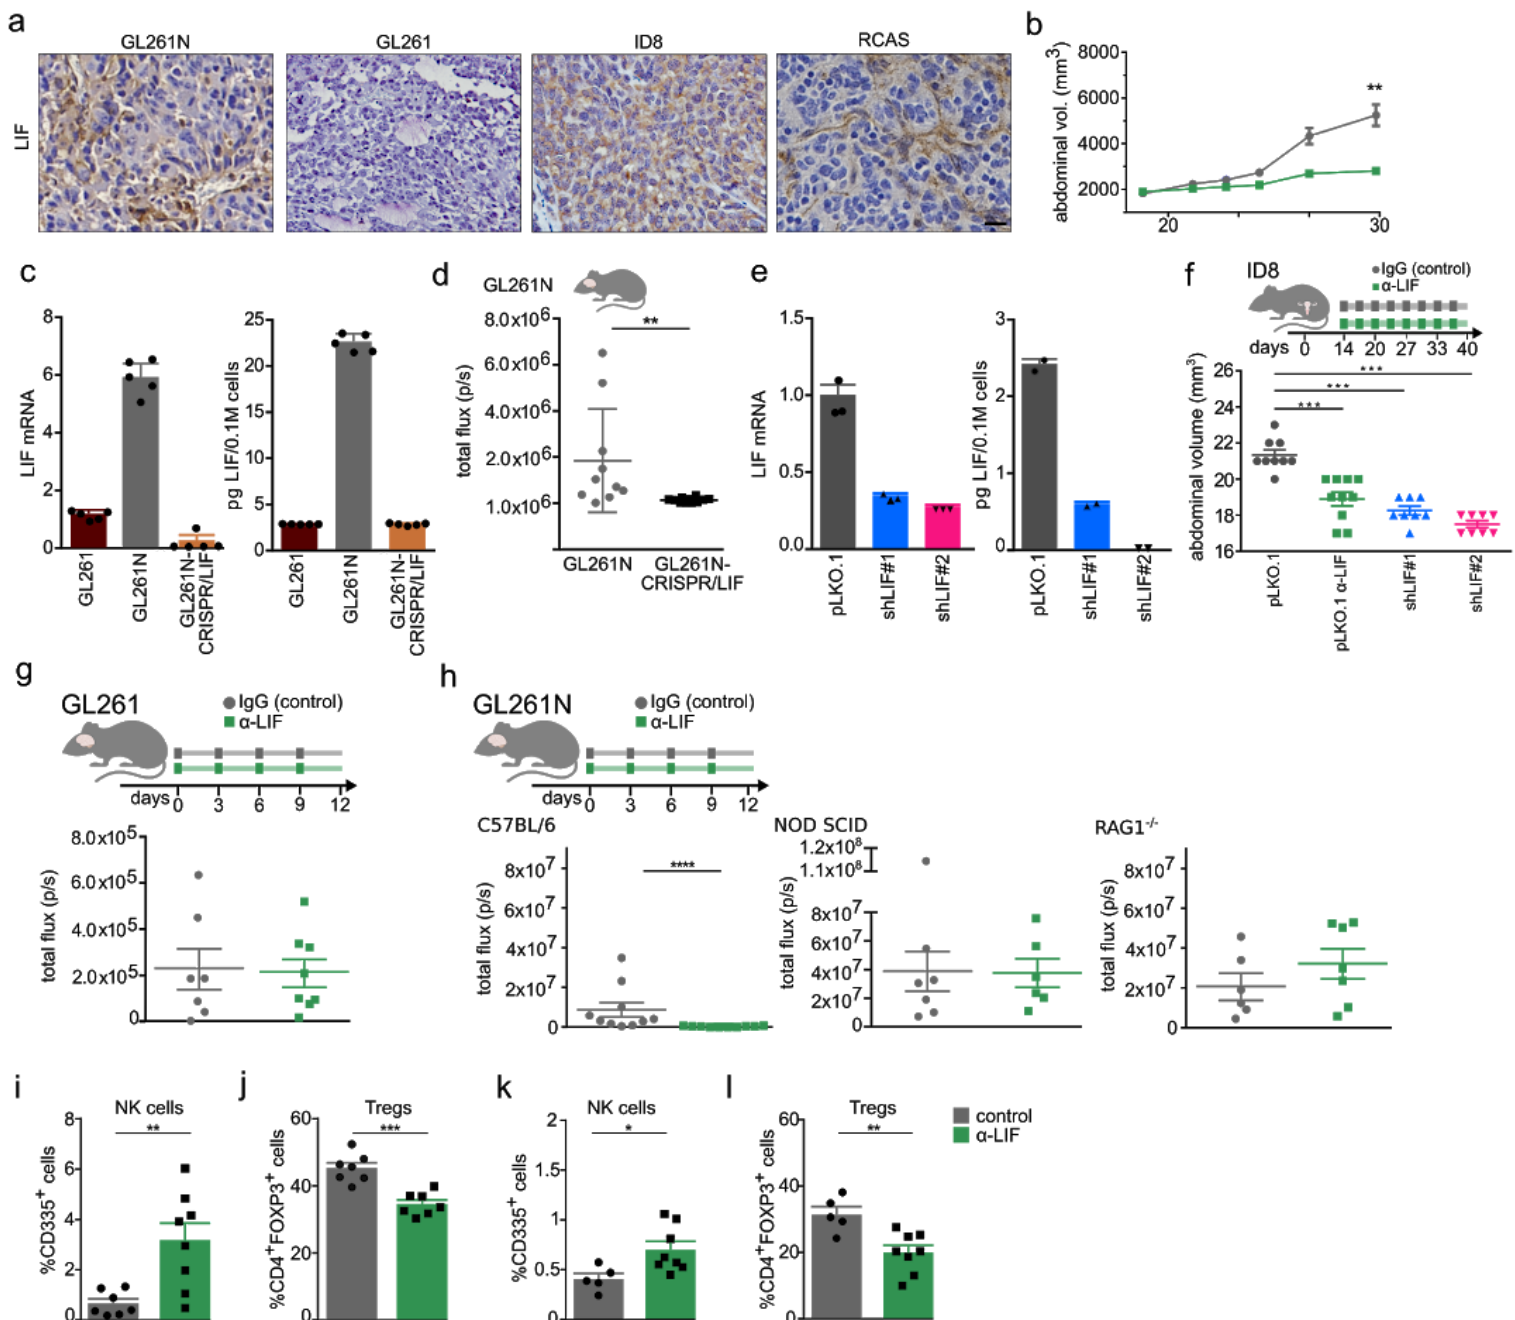

### Supplementary Figure 2. LIF blockade in syngeneic models inhibits tumor growth.

**a**, LIF IHC was performed in GL261N, GL261, ID8, and RCAS tumors. Representative images are shown. Scale bar, 20 μm. **b**, Time course of abdominal volume of ID8 mice treated with anti-LIF or IgG. **c**, qRT-PCR and ELISA of LIF was performed in GL261, GL261N and GL261N-CRISPR/LIF cells. **d**, Tumor growth as total flux (p/s) is shown at 12 dpi in mice inoculated with GL261N and

GL261N-CRISPR/LIF. **e, f**, ID8 cells were infected with the pLKO.1 or two independent pLKO.1-shLIF lentivirus. LIF expression was determined by qRT-PCR and ELISA (**e**). **f**, ID8 cells were inoculated in the peritoneum of mice. Treatment scheme is shown. Abdominal volume ( $\text{mm}^3$ ) was measured at 40 dpi. **g**, GL261 tumor growth in mice treated with anti-LIF or control IgG at 12 dpi. **h**, GL261N cells were inoculated in C57BL/6 mice and two immunodeficient models, NOD SCID and RAG1<sup>-/-</sup>. Treatment scheme is shown. Tumor growth was measured at 12 dpi. **i-l**, Percentages of NK cells (CD335<sup>+</sup>) and Tregs (CD3<sup>+</sup>CD4<sup>+</sup>FoxP3<sup>+</sup>), gated on CD4<sup>+</sup> T cell population, in GL261N (**i-j**) and ID8 (**k-l**) tumors were determined by flow cytometry. Data are presented as mean  $\pm$  SEM. Statistical analysis by Mann-Whitney T test. \*P < 0.05; \*\*P < 0.01; \*\*\*P < 0.001; \*\*\*\*P < 0.0001.

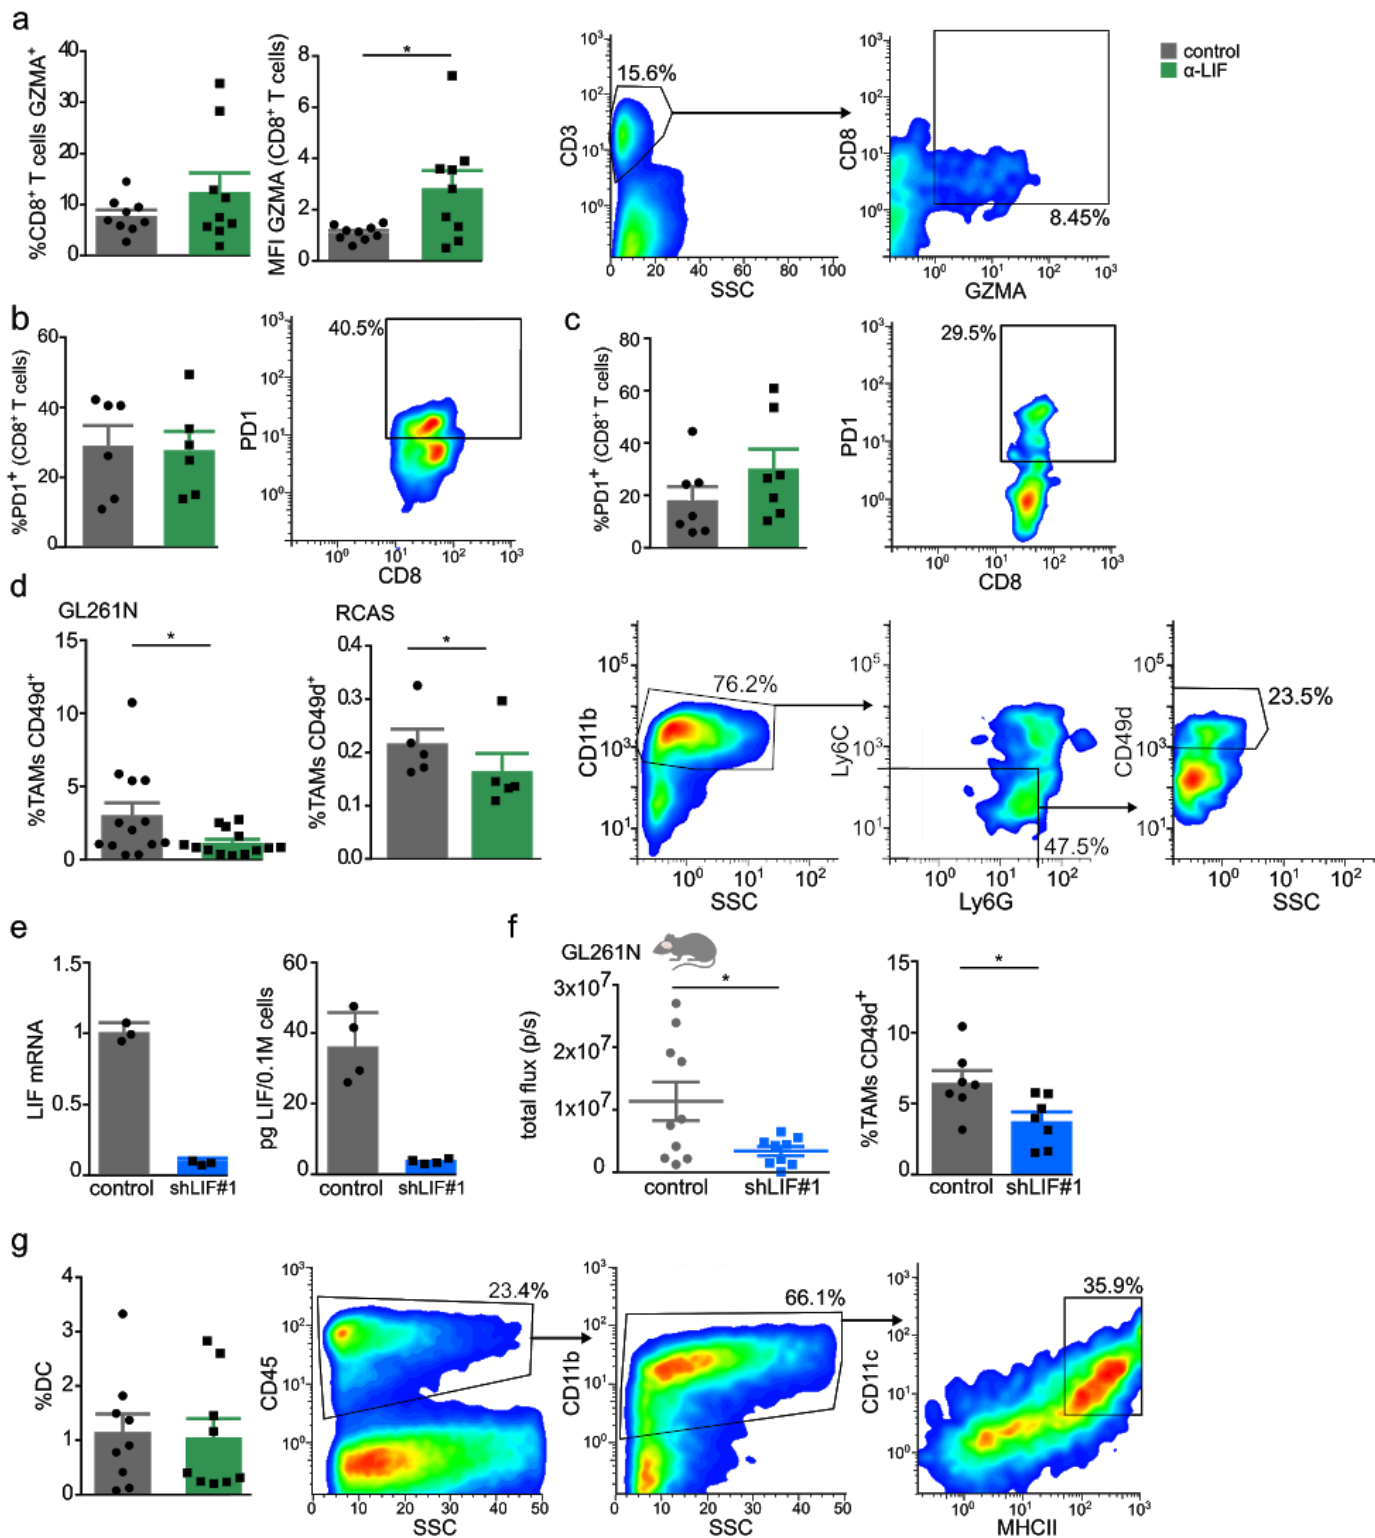

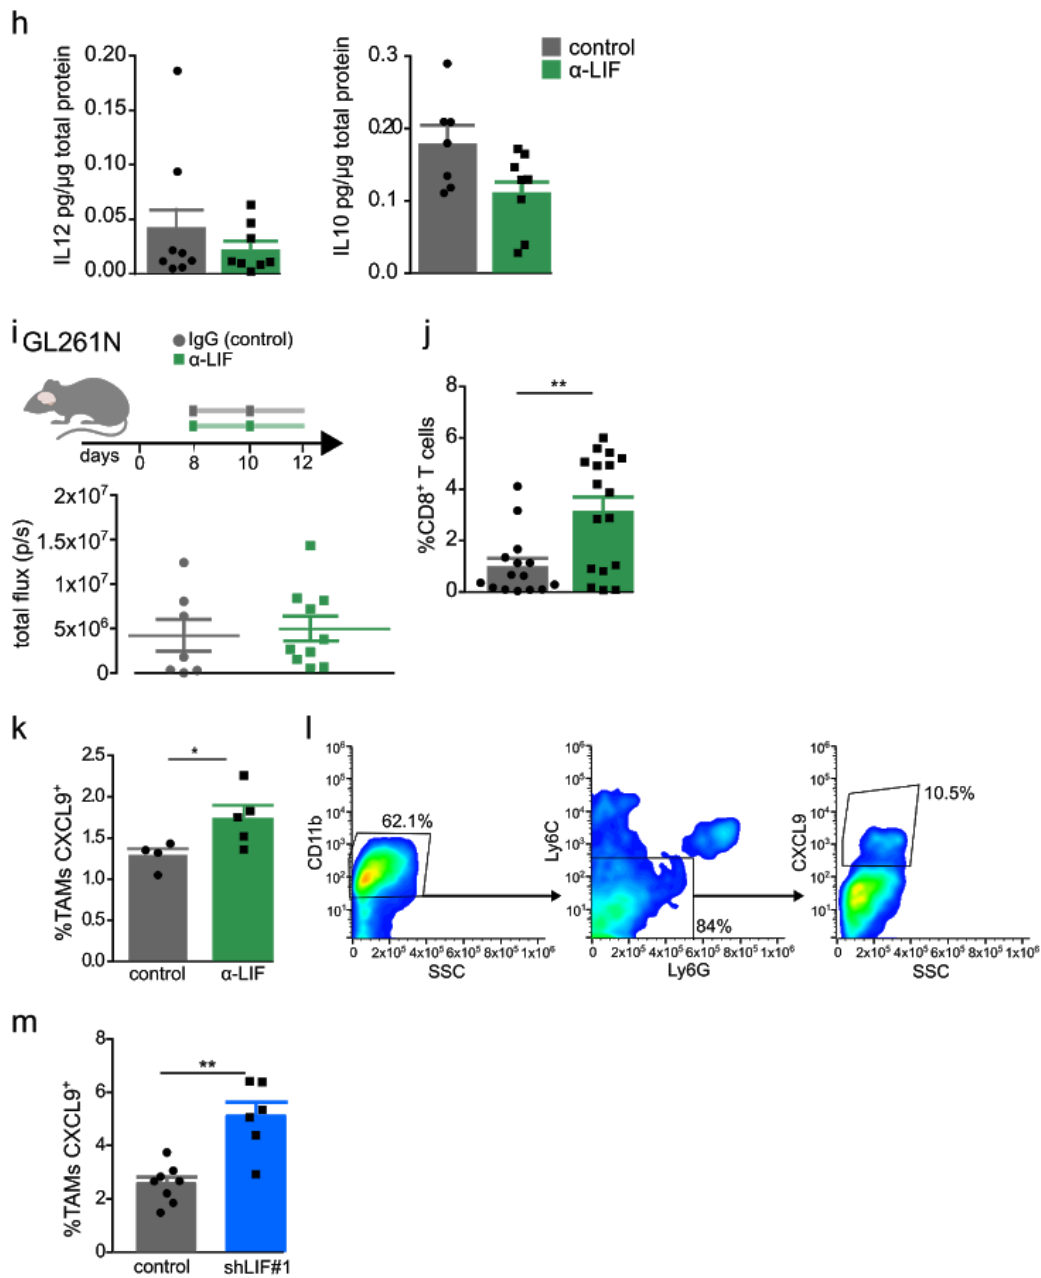

**Supplementary Figure 3. Characterization of the immune cell infiltrates upon treatment with anti-LIF.**

**a**, Percentage and MFI of GZMA in the CD8<sup>+</sup> T cell population of GL261N tumors. **b**, **c**, Quantification of PD1<sup>+</sup> CD8<sup>+</sup> T cells in tumors of GL261N (**b**) and ID8 (**c**) models. **d**, **f**, Percentage of infiltrating TAMs (CD11b<sup>+</sup> Ly6G<sup>-</sup> Ly6C<sup>-</sup> CD49d<sup>+</sup>) in GL261N and RCAS tumors in response to treatment with anti-LIF (**d**) or in GL261N shLIF tumors (**f**). **e**, GL261N cells were infected with the

non-specific shRNA (Control) and the shLIF (shLIF#1) lentivirus. LIF expression was determined by qRT-PCR and ELISA. **f**, Tumor growth as total flux (p/s) is shown at 12 dpi in mice inoculated with GL261N control and shLIF#1. **g**, Dendritic cell population (DC) (CD11b<sup>+</sup> CD11c<sup>+</sup> MHCII<sup>+</sup>) in GL261N tumors. **a-d, g**, Representative flow cytometry dot plots are shown. **h**, ELISA of IL12 and IL10 in GL261N tumors. **i**, GL261N tumor-bearing mice were treated with anti-LIF at 8 dpi. Treatment scheme is shown. Tumor volume was measured as total flux (p/s) at 13 dpi. **j**, Percentage of CD8<sup>+</sup> T cells (CD3<sup>+</sup> CD8<sup>+</sup>) in tumors was determined by flow cytometry. **k, m**, Percentage of CXCL9<sup>+</sup> in TAMs (CD11b<sup>+</sup> Ly6G<sup>-</sup> Ly6C<sup>-</sup>) from anti-LIF treated or untreated RCAS tumors (**k**) or from control or shLIF GL261N tumors (**m**). **l**, Representative flow cytometry dot plots of CXCL9, gated on TAMs, in GL261N tumors. Data are presented as mean  $\pm$  SEM. Statistical analysis by Mann-Whitney T test. \*P < 0.05; \*\*P < 0.01.

GL261N 

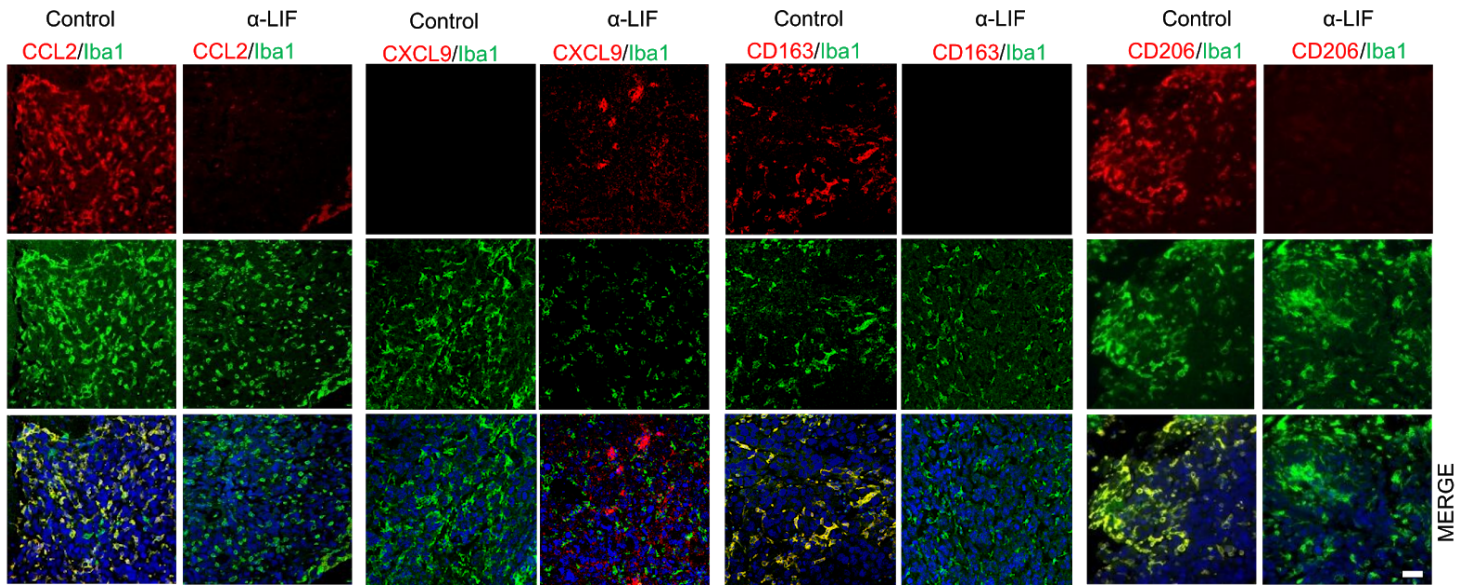

**Supplementary Figure 4. Regulation of CXCL9, CCL2, CD163 and CD206 expression by LIF in GL261N tumors.**

Individual IF staining images of the indicated factors in GL261N tumors are shown. Scale bar, 20  $\mu$ m.



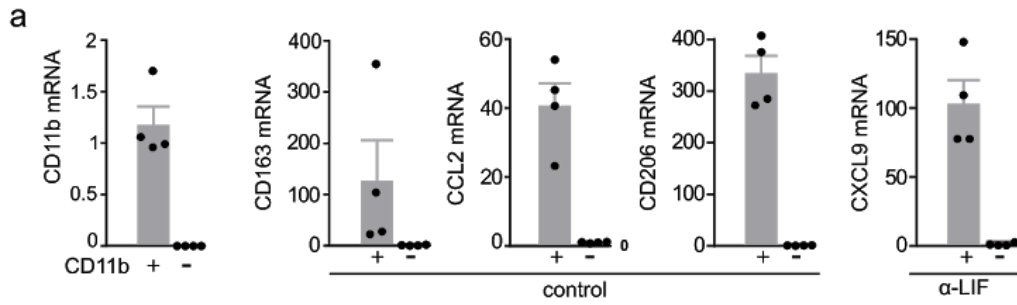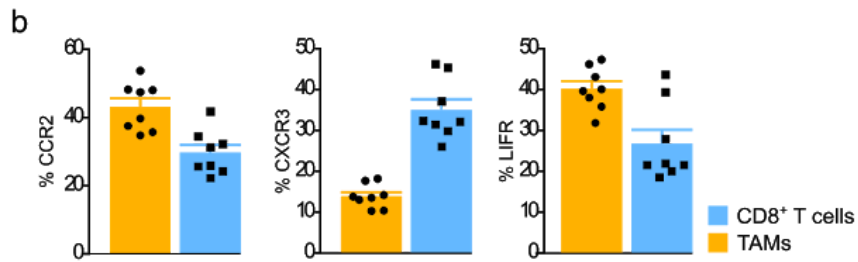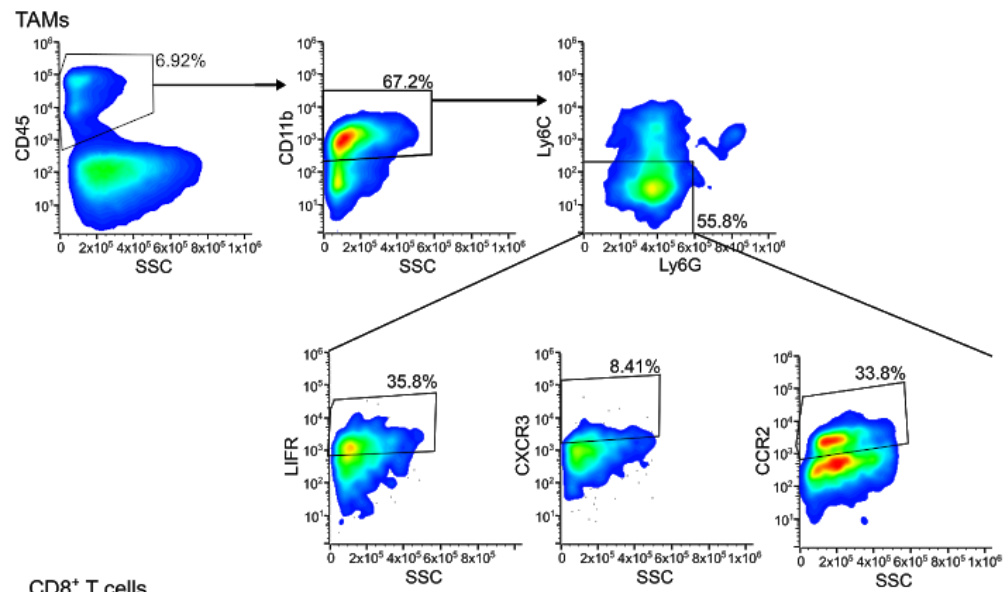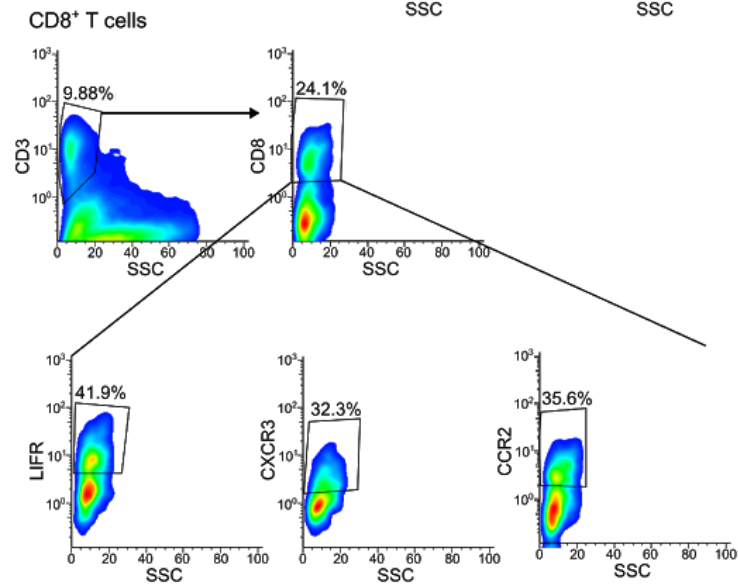

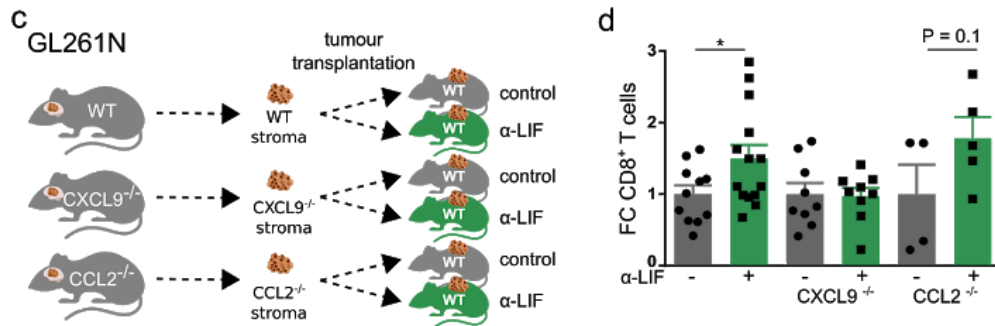

**Supplementary Figure 5. Cell specific expression of cytokines and receptors, and functional contributions.**

**a**, qRT-PCR analyses of the indicated genes in CD11b<sup>+</sup> Ly6G<sup>-</sup> Ly6C<sup>-</sup> and CD11b<sup>-</sup> Ly6G<sup>-</sup> Ly6C<sup>-</sup> cells sorted from GL261N tumors. **b**, Percentage of CCR2, CXCR3 and LIFR receptors in TAMs (CD11b<sup>+</sup> Ly6G<sup>-</sup> Ly6C<sup>-</sup>) and CD8<sup>+</sup> T cell (CD3<sup>+</sup> CD8<sup>+</sup>) populations determined by flow cytometry. Representative flow cytometry dot plots are shown. **c**, **d**, GL261N tumors from WT, CXCL9<sup>-/-</sup> and CCL2<sup>-/-</sup> mice were isolated and subcutaneously implanted into control or anti-LIF treated mice. Schematic representation of the experimental procedures is shown (**c**). **d**, 48 h after transplantation, FC of infiltrating CD8<sup>+</sup> T cells were analysed by flow cytometry. Data are presented as mean  $\pm$  SEM. Statistical analysis by Mann-Whitney T test. \*P < 0.05.

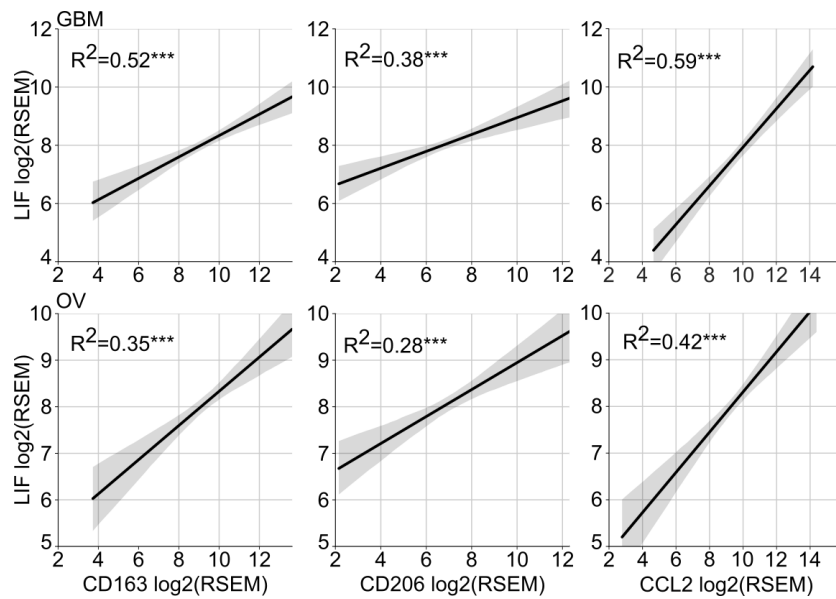

**Supplementary Figure 6. Correlation between LIF and CD163, CD206 and CCL2 expression in GBM and ovarian cancer.**

Regression plots between LIF and CD163, CD206, CCL2 expression (in log<sub>2</sub> RSEM) in GBM and ovarian cancer (OV) TCGA tumor cohorts (see Supplementary Data 1b). The shade represents the confidence intervals of the regression estimate.

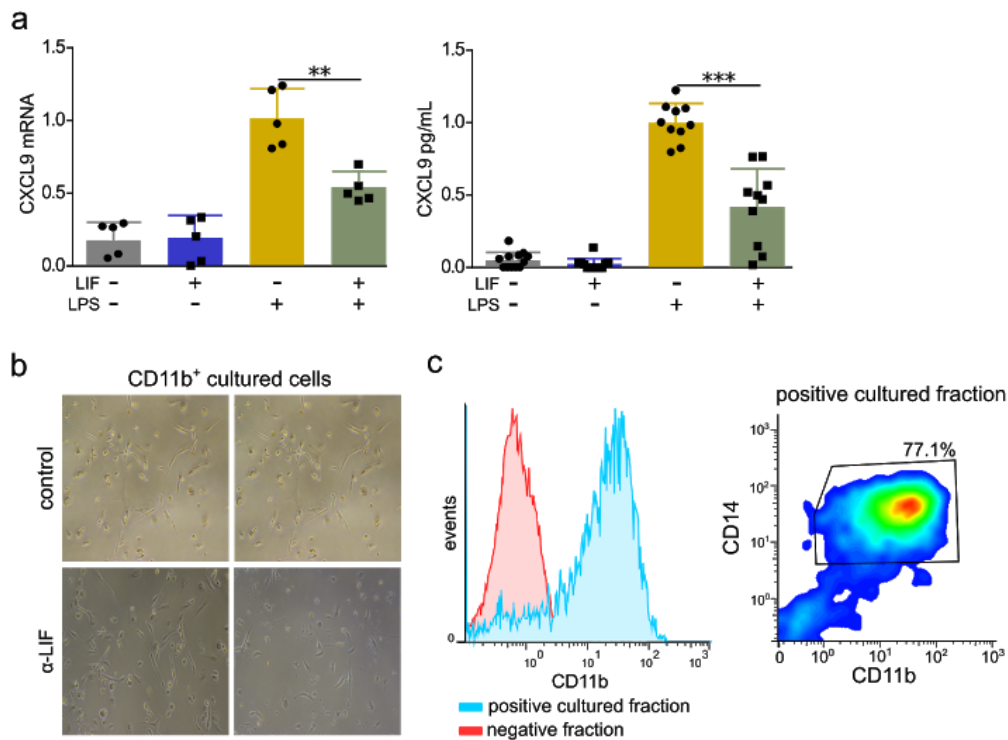

**Supplementary Figure 7. Regulation of CXCL9 by LIF in murine and human macrophages.**

**a**, BMDMs were pre-incubated with 20 ng/ml LIF for 18 h and then stimulated with 1 μg/ml LPS for 6 h. *CXCL9* mRNA expression and secretion were determined by qRT-PCR and ELISA, respectively.

**b**, **c**, CD11b<sup>+</sup> sorted cells from human GBM were cultured. Representative images of control and treated cells are shown (**b**). Percentage of CD11b<sup>+</sup> CD14<sup>+</sup> cells in the culture was determined by flow cytometry. Data are presented as mean ± SD. Statistical analyses by Student's *t*-test. \*\**P* < 0.01; \*\*\**P* < 0.001.

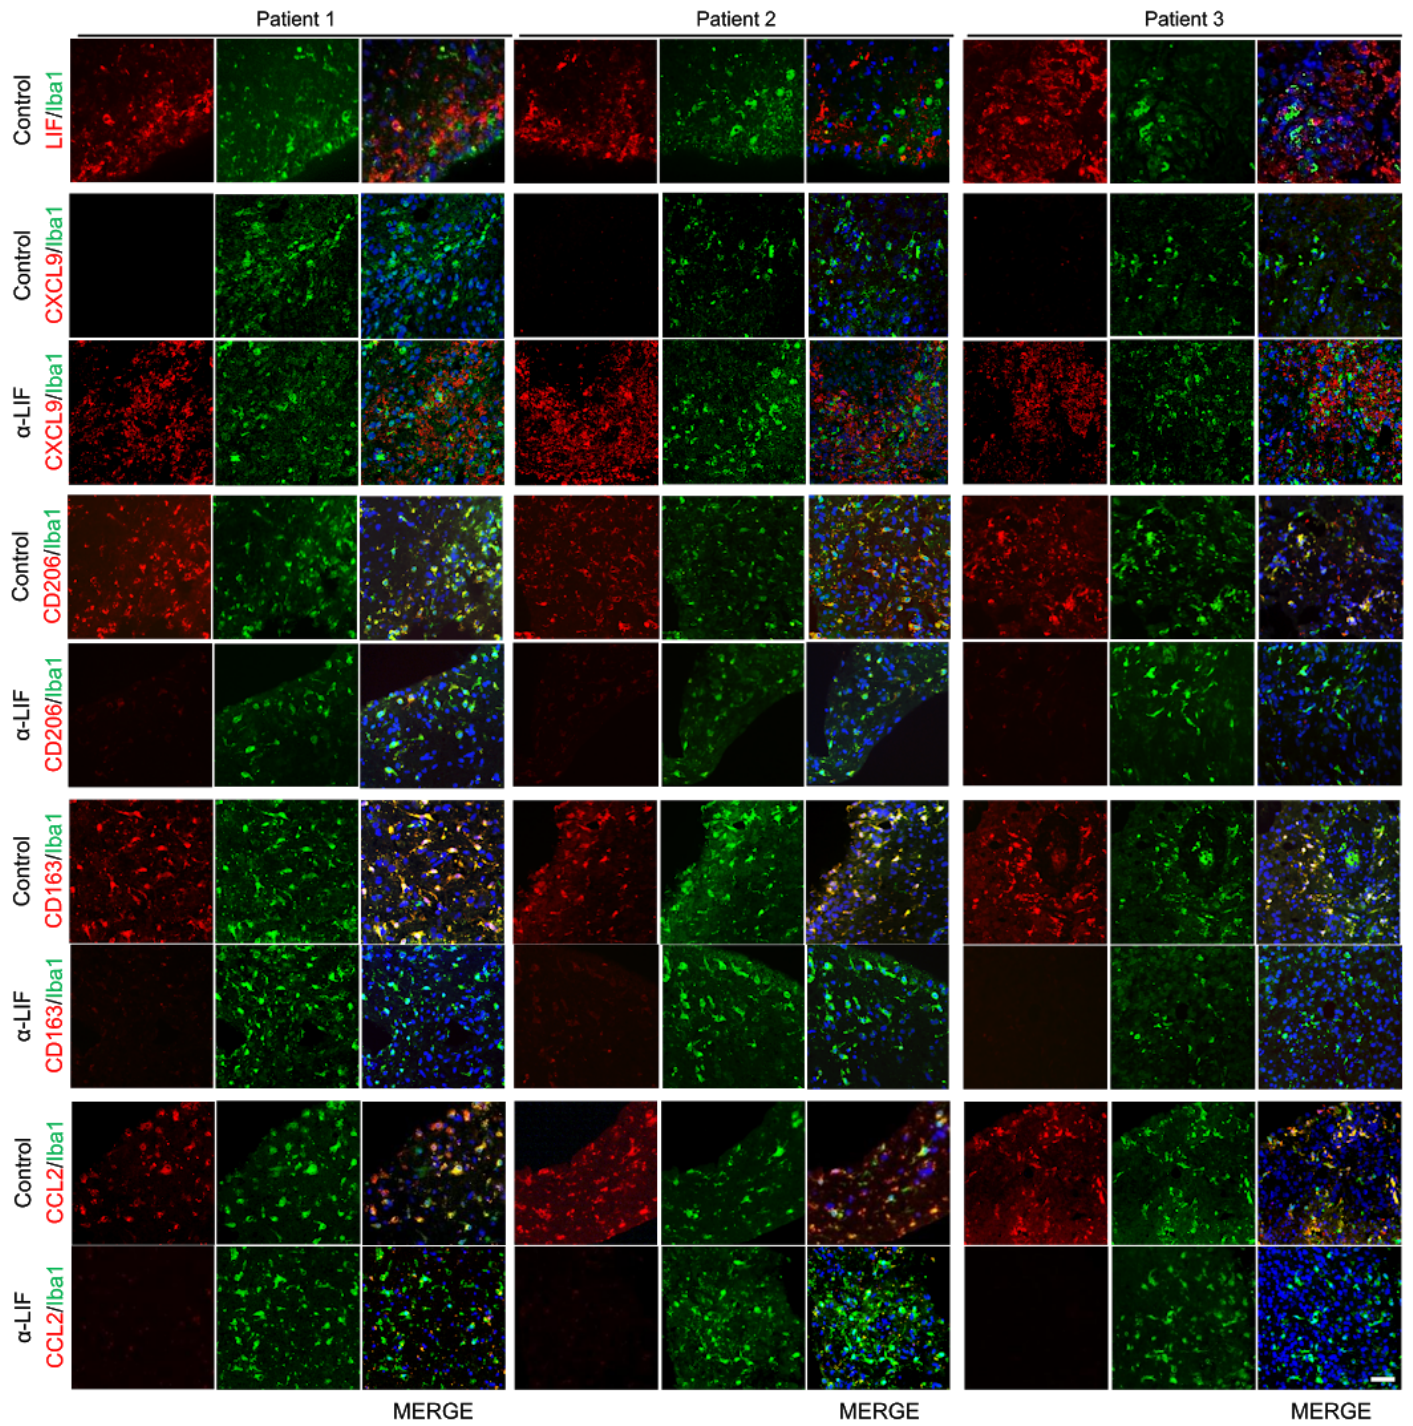

**Supplementary Figure 8. Regulation of CXCL9, CCL2, CD163 and CD206 expression by LIF in human GBM tumors.**

Individual IF staining images of the indicated factors in human GBM organotypic slice cultures are shown. Scale bar, 20 μm.

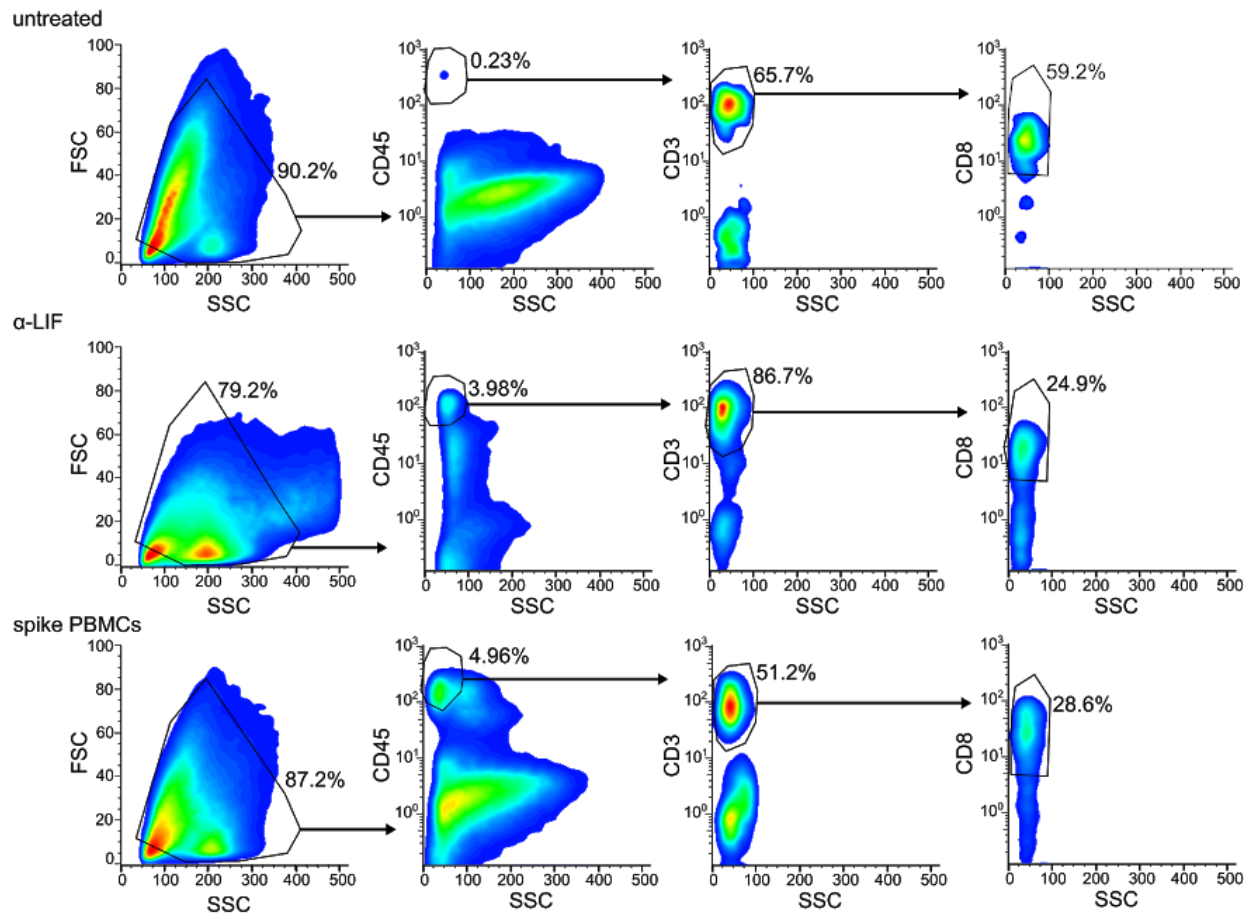

**Supplementary Figure 9. LIF regulates infiltration of CD8<sup>+</sup> T cells into human GBM organotypic slice cultures.**

Representative flow cytometry plots of untreated, anti-LIF or positive control (spike PBMCs) of human GBM organotypic specimens cultured with PBMCs for 48 h. Percentage of CD8<sup>+</sup> T cells was determined within CD3<sup>+</sup> cells within the CD45<sup>+</sup> population.

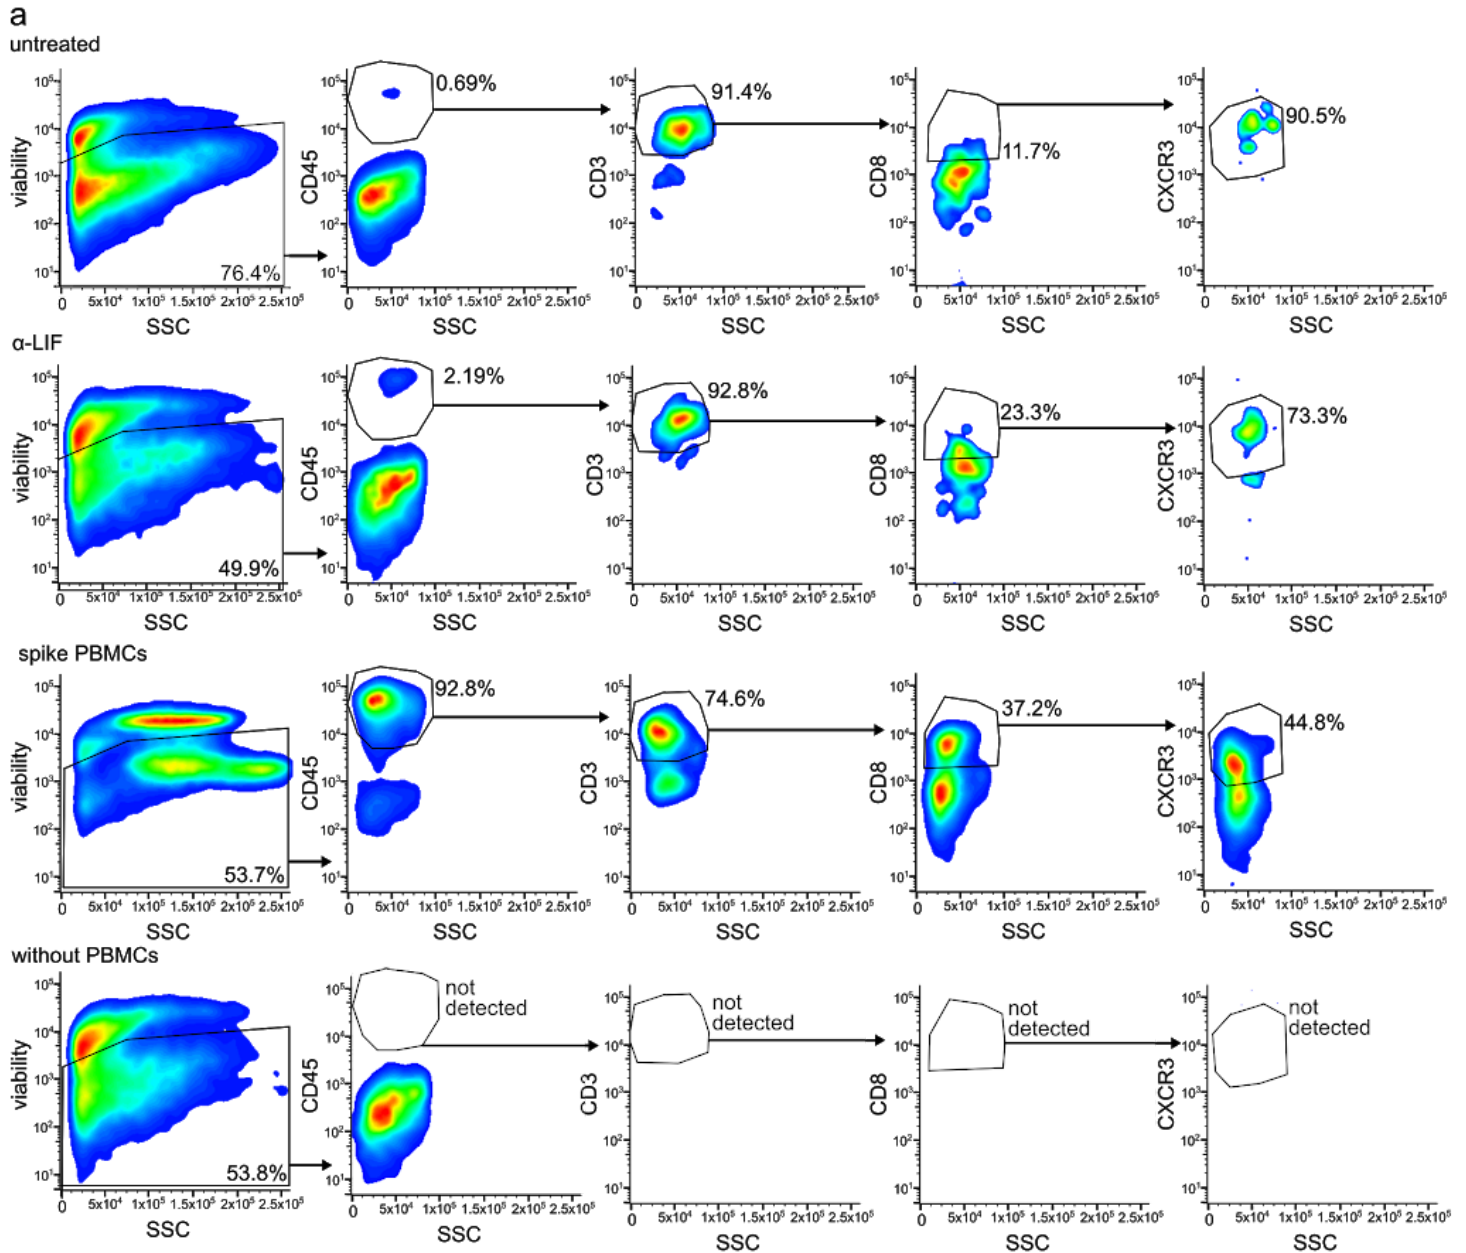

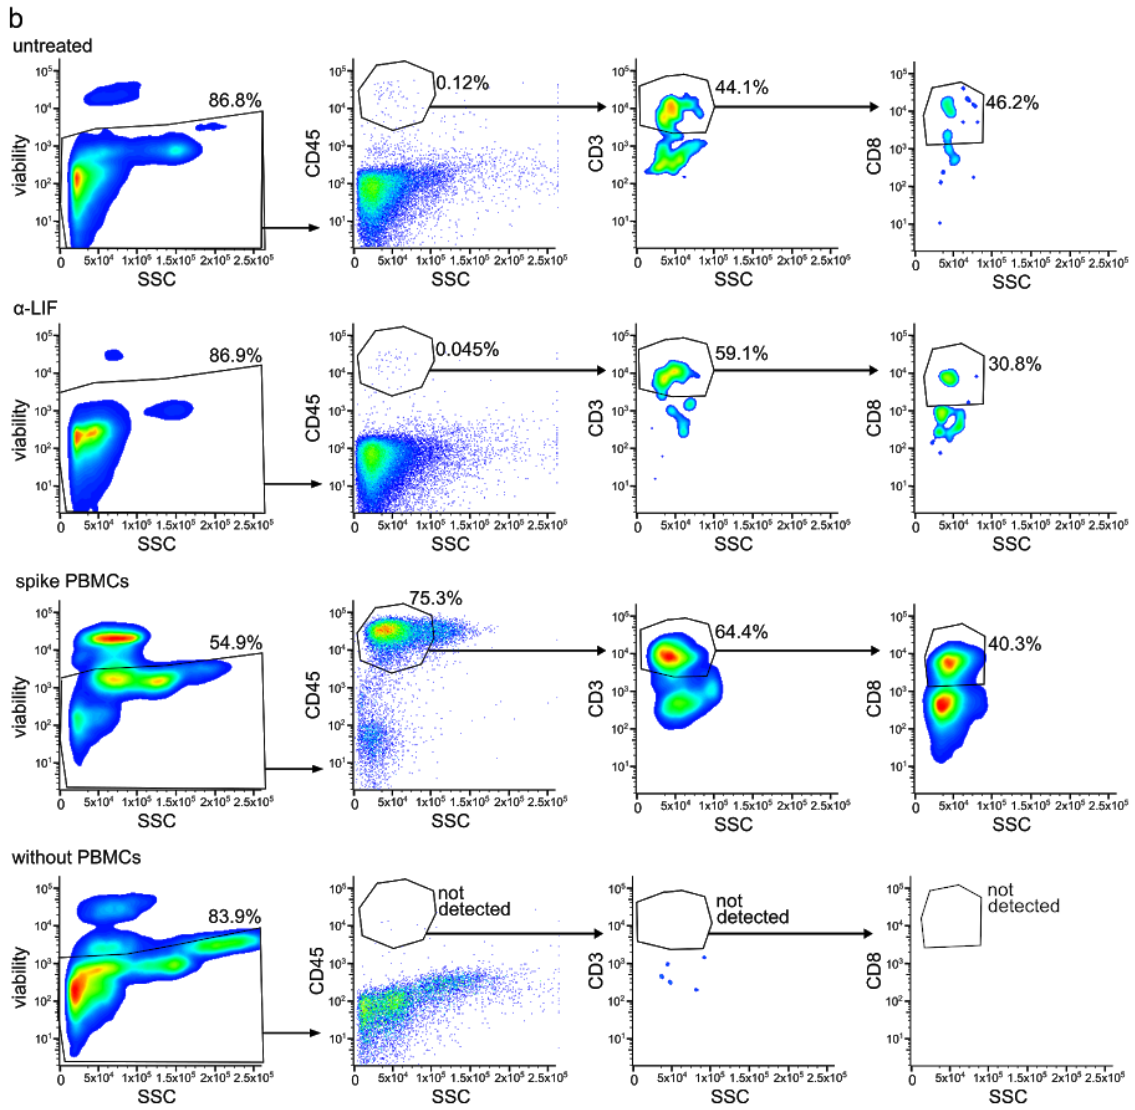



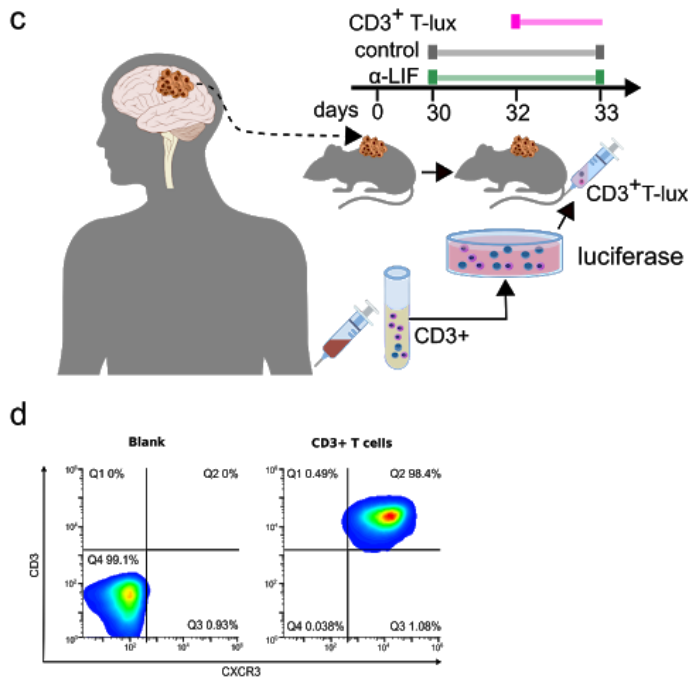

**Supplementary Figure 10. LIF regulates infiltration of CD8<sup>+</sup> T cells into human GBM specimens *in vivo*.**

**a, b,** Representative flow cytometry plots of tumors (**a**) or blood (**b**) obtained from untreated or anti-LIF treated human GBM tumors engrafted into NSG mice and inoculated with human PBMCs. Positive control (spike PBMCs) and negative control (no PBMCs inoculation) are included. Percentage of CD8<sup>+</sup> T cells was determined within CD3<sup>+</sup> cells within the CD45<sup>+</sup> population. A marker of viability was also used. In some occasions CXCR3 (CXCL9 receptor) was also determined inside the CD8<sup>+</sup> T cell population. Importantly, a negative control (without PBMCs) was also used to assure specificity of leukocyte detection. **c,** Schematic representation of the experimental procedure performed by inoculating CD3<sup>+</sup> T cells expressing luciferase (CD3<sup>+</sup>T-lux) into mice bearing human GBM tumors. **d,** Flow cytometry plots representing percentage of CXCR3<sup>+</sup> cells in luciferase-expressing CD3<sup>+</sup> T cells.

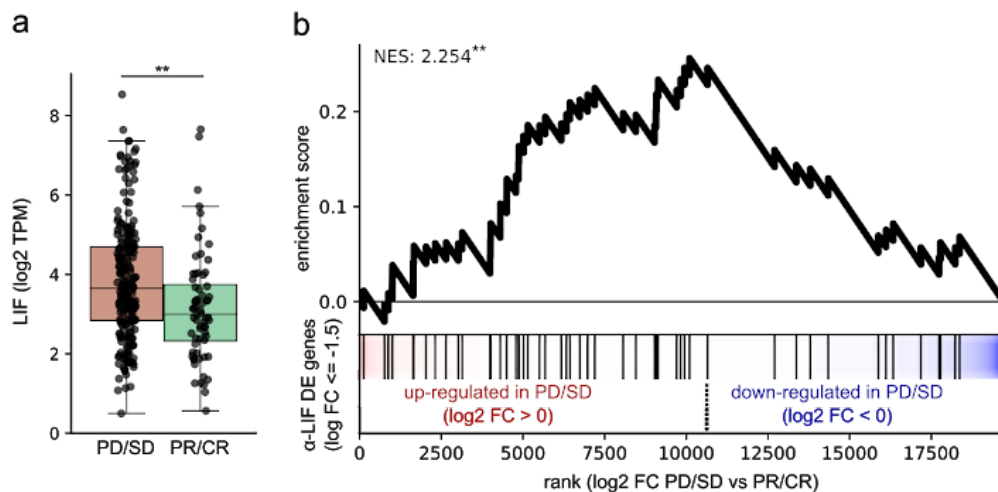

**Supplementary Figure 11. LIF is associated to anti-PD1 treatment resistance in clinical trials.**

**a**, LIF is up-regulated in non-responder anti-PD1 treated patients. Boxplot representing LIF differential expression between non-responder anti-PD1 treated patients (PD/SD: Progressive Disease/Sustained Disease) and responder patients (PR/CR: Partial response/Complete Response). Middle line depicts the median and the whiskers the interquartile range. Statistical analysis by Mann-Whitney T test. **\*\*P < 0.01.** **b**, Genes down-regulated upon anti-LIF treatment are up-regulated in anti-PD1 treated non-responder patients. Enrichment plot of the Gene Set Enrichment (GSEA) analysis of the genes down-regulated upon anti-LIF treatment in non-responder tumors. Genes down-regulated upon anti-LIF treatment were obtained from the list of genes differentially expressed in anti-LIF treated ID8 mice; all genes with a log Fold Change (FC) < -1.5 were considered (see Supplementary Data 1). NES (normalised enrichment score). Statistical analysis by GSEA permutation test (n=10,000). **\*\*P < 0.01.**
